# Supplementary material for: Logging cuts the functional importance of invertebrates in tropical rainforest
Source: PubMed Central journal article supplement (PMC4403313; doi:10.1038/ncomms7836), 2015-04-13
Supplement: ncomms7836-s1.pdf [file ncomms7836-s1.pdf]

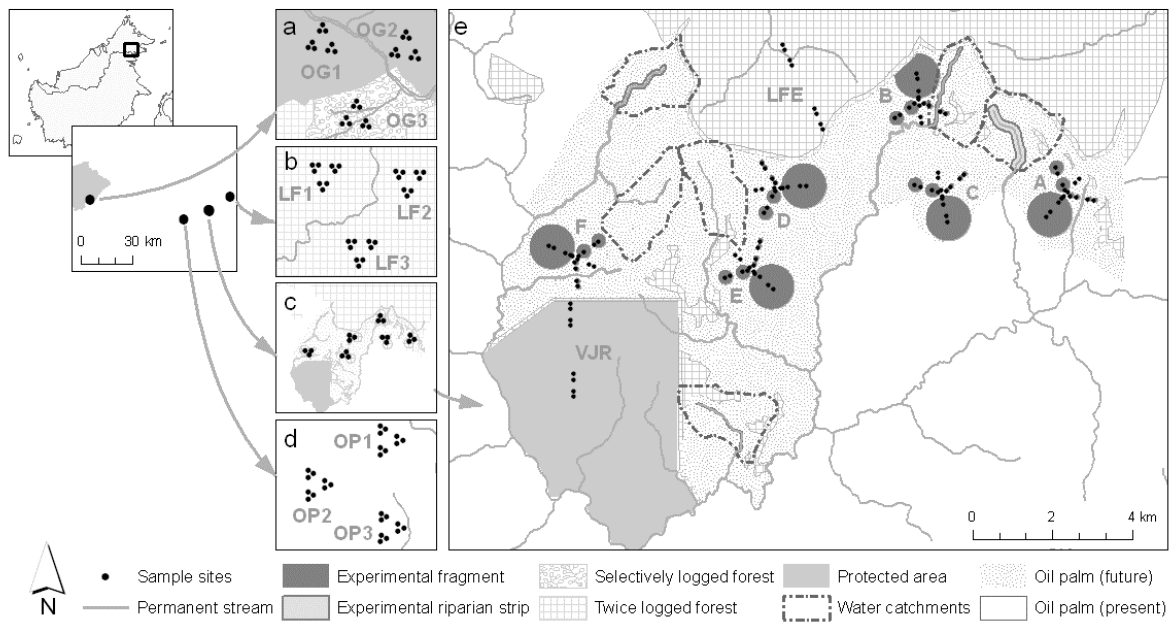

Supplementary Fig. 1. Design of the sampling scheme used for collecting data at the SAFE Project in Malaysian Borneo. Here, we used data collected from sample blocks in primary forest (Blocks OG1 and OG2) and from twice-logged forest that was continuous at the time of data collection, but will become isolated forest fragments in the future (Blocks A-F). Displayed sample sites are second-order points. Figure reproduced from Ewers et al.<sup>1</sup>

Supplementary Table 1. Mixed effects modelling of the effects of logging on three ecosystem process rates: (a) leaf litter decomposition rate, (b) seed disturbance rate and (c) invertebrate predation rate.

| Model name                          | Ecosystem function: (a) Decomposition rate |                      | (b) Seed disturbance rate         |                      | (c) Invertebrate predation rate   |                       |
|-------------------------------------|--------------------------------------------|----------------------|-----------------------------------|----------------------|-----------------------------------|-----------------------|
|                                     | Linear mixed model                         |                      | Binomial mixed model (logit link) |                      | Binomial mixed model (logit link) |                       |
|                                     | Null model                                 | Full model           | Null model                        | Full model           | Null model                        | Full model            |
| Fixed effects                       | <i>b</i> [95% CI]                          | <i>b</i> [95% CI]    | <i>b</i> [95% CI]                 | <i>b</i> [95% CI]    | <i>b</i> [95% CI]                 | <i>b</i> [95% CI]     |
| Intercept                           | -0.2 [-0.22, -0.19]                        | -0.19 [-0.21, -0.18] | -2.88 [-3.96, -1.79]              | -1.54 [-2.87, -0.22] | -0.08 [-0.55, 0.38]               | 0.2 [-0.51, 0.91]     |
| Habitat (logged)                    | -                                          | -0.03 [-0.06, -0.01] | -                                 | -1.87 [-3.38, -0.35] | -                                 | -0.48 [-1.42, 0.45]   |
| Random effects                      | VC                                         | VC                   | VC                                | VC                   | VC                                | VC                    |
| 1st order                           | -                                          | -                    | -                                 | -                    | 0.0000                            | 0.0157                |
| 2nd order                           | -                                          | -                    | 1.8414                            | 1.9500               | 0.0259                            | 0.2041                |
| 3rd order                           | 0.0004                                     | 0.0002               | 0.9049                            | 0.7033               | 0.0000                            | 0.0000                |
| Block                               | -                                          | -                    | 0.4997                            | 0.0000               | -                                 | -                     |
| Residuals (additive dispersion)     | 0.0006                                     | 0.0006               | -                                 | -                    | -                                 | -                     |
| Fixed factors                       | -                                          | 0.0003               | -                                 | 0.6031               | -                                 | 0.0575                |
| PCV <sub>[1st order]</sub>          |                                            | -                    |                                   | -                    |                                   | -28067878.53%         |
| PCV <sub>[2nd order]</sub>          |                                            | -                    |                                   | -5.90%               |                                   | -688.34%              |
| PCV <sub>[3rd order]</sub>          |                                            | 53.58%               |                                   | 22.28%               |                                   | 99.40%                |
| PCV <sub>[Block]</sub>              |                                            | -                    |                                   | 100.00%              |                                   | -                     |
| PCV <sub>[Residuals]</sub>          |                                            | 2.59%                |                                   | -                    |                                   | -                     |
| R <sup>2</sup> <sub>GLMM(m)</sub>   |                                            | 27.19%               |                                   | 9.21%                |                                   | 1.61%                 |
| R <sup>2</sup> <sub>GLMM(c)</sub>   |                                            | 44.57%               |                                   | 49.74%               |                                   | 7.77%                 |
| AIC                                 | -92.7                                      | -89.2                | 1554.9                            | 1553.0               | 148.4                             | 149.4                 |
| BIC                                 | -89.0                                      | -84.4                | 1568.9                            | 1570.4               | 158.9                             | 162.5                 |
| Spatial autocorrelation (residuals) |                                            |                      |                                   |                      |                                   |                       |
| x-intercept                         |                                            | -1.22 [-68.21, 1.16] |                                   | -0.49 [-4.93, 0.19]  |                                   | -40.48 [-44.72, 0.57] |
| y-intercept                         |                                            | -0.14 [-0.98, 0.34]  |                                   | -0.08 [-0.2, 0]      |                                   | -0.01 [-0.2, 0.22]    |

For full models, the intercept represents the primary forest control. CI = Confidence interval; PCV = Proportion change in variance; NA = Not applicable/available; AIC = Akaike Information Criterion; BIC = Bayesian Information Criterion; VC = Variance components

Supplementary Table 2. Mixed effects modelling testing for an interaction effect between logging and experimental treatment on three ecosystem process rates: (a) leaf litter decomposition rate, (b) seed disturbance rate and (c) invertebrate predation rate.

| Model name                                | Ecosystem function: (a) Decomposition rate |                      | (b) Seed disturbance rate         |                      | (c) Invertebrate predation rate   |                      |
|-------------------------------------------|--------------------------------------------|----------------------|-----------------------------------|----------------------|-----------------------------------|----------------------|
|                                           | Linear mixed model                         |                      | Binomial mixed model (logit link) |                      | Binomial mixed model (logit link) |                      |
|                                           | Null model                                 | Full model           | Null model                        | Full model           | Null model                        | Full model           |
| Fixed effects                             | <i>b</i> [95% CI]                          | <i>b</i> [95% CI]    | <i>b</i> [95% CI]                 | <i>b</i> [95% CI]    | <i>b</i> [95% CI]                 | <i>b</i> [95% CI]    |
| Intercept                                 | -0.21 [-0.23, -0.19]                       | -0.23 [-0.25, -0.21] | -1.74 [-2.74, -0.74]              | -1.5 [-2.5, -0.5]    | 0.08 [-0.52, 0.67]                | 0.21 [-0.47, 0.9]    |
| Treatment (no inverts)                    | 0.05 [0.04, 0.07]                          | 0.09 [0.08, 0.1]     | 2.91 [2.78, 3.03]                 | 2.81 [2.58, 3.03]    | -2.21 [-2.98, -1.44]              | -4.13 [-6.35, -1.91] |
| Treatment (no other)                      | 0 [-0.01, 0.02]                            | 0 [-0.01, 0.02]      | 0.7 [0.58, 0.82]                  | 0.13 [-0.08, 0.34]   | -1.47 [-2.12, -0.83]              | -1.23 [-2.15, -0.31] |
| Habitat (logged)                          | 0.02 [-0.01, 0.04]                         | 0.03 [0.01, 0.06]    | -0.79 [-1.95, 0.37]               | -1.16 [-2.33, 0.01]  | -0.28 [-0.97, 0.41]               | -0.51 [-1.41, 0.39]  |
| Treatment (no inverts) : Habitat (logged) | -                                          | -0.06 [-0.08, -0.04] | -                                 | 0.19 [-0.08, 0.46]   | -                                 | 2.65 [0.26, 5.03]    |
| Treatment (no other : Habitat (logged)    | -                                          | 0 [-0.02, 0.02]      | -                                 | 0.84 [0.57, 1.1]     | -                                 | -0.54 [-1.86, 0.78]  |
| Random effects                            | VC                                         | VC                   | VC                                | VC                   | VC                                | VC                   |
| 1st order                                 | -                                          | -                    | -                                 | -                    | 0.48                              | 0.05                 |
| 2nd order                                 | 0.00013                                    | 0.00023              | 0.74                              | 0.74                 | 0.00                              | 0.00                 |
| 3rd order                                 | 0.00018                                    | 0.00018              | 0.20                              | 0.20                 | 0.00                              | 0.00                 |
| Block                                     | -                                          | -                    | 0.11                              | 0.11                 | -                                 | -                    |
| Residuals (additive dispersion)           | 0.00049                                    | 0.00021              | -                                 | -                    | -                                 | -                    |
| Fixed factors                             | -                                          | 0.00080              | -                                 | 1.63                 | -                                 | 1.60                 |
| PCV <sub>[1st order]</sub>                |                                            | -                    |                                   | -                    |                                   | 73.28%               |
| PCV <sub>[2nd order]</sub>                |                                            | NA                   | NA                                | -59.28%              | NA                                | NA                   |
| PCV <sub>[3rd order]</sub>                |                                            | -5.77%               | NA                                | -20.48%              | NA                                | NA                   |
| PCV <sub>[Block]</sub>                    |                                            | -                    | NA                                | 37.58%               | -                                 | -                    |
| PCV <sub>[Residuals]</sub>                |                                            | 82.81%               | NA                                | -                    | -                                 | -                    |
| R <sup>2</sup> <sub>GLMM(m)</sub>         | 44.39%                                     | 56.49%               | 26.48%                            | 27.37%               | 18.74%                            | 29.66%               |
| R <sup>2</sup> <sub>GLMM(c)</sub>         | 65.98%                                     | 85.25%               | 44.30%                            | 44.85%               | 29.02%                            | 39.13%               |
| AIC                                       | -278.97                                    | -299.06              | 6927.9                            | 7608.63              | 321.96                            | 315.19               |
| BIC                                       | -263.04                                    | -278.57              | 6979.56                           | 7649.33              | 348.03                            | 348.70               |
| Spatial autocorrelation (residuals)       |                                            |                      |                                   |                      |                                   |                      |
| x-intercept                               |                                            | -0.5 [-67.64, 3]     |                                   | -0.27 [-1.98, -0.14] |                                   | -0.06 [-0.19, 0.28]  |
| y-intercept                               |                                            | -0.21 [-0.21, 0.14]  |                                   | -0.02 [-0.15, -0.05] |                                   | -0.03 [-0.14, 0.13]  |

For full models, the intercept represents the experimental control in primary forest habitat. CI = Confidence interval; PCV = Proportion change in variance; NA = Not applicable/available; AIC = Akaike Information Criterion; BIC = Bayesian Information Criterion; VC = Variance components

Supplementary Table 3. Mixed effects modelling testing for the effects of logging on seven aspects of invertebrate community composition: (a) beetle abundance, (b) termite occupancy, (c) litter and wood termite occupancy, (d) termite genus richness, (e) earthworm abundance, (f) earthworm biomass and (g) total invertebrate biomass.

| Model name                          | Response: (a) Beetle abundance<br>Poisson mixed model (log link) |                      | (b) Termite occupancy<br>Binomial mixed model (logit link) |                      | (c) Litter and wood termite occupancy<br>Binomial mixed model (logit link) |                      |
|-------------------------------------|------------------------------------------------------------------|----------------------|------------------------------------------------------------|----------------------|----------------------------------------------------------------------------|----------------------|
|                                     | Null model                                                       | Full model           | Null model                                                 | Full model           | Null model                                                                 | Full model           |
| Fixed effects                       | <i>b</i> [95% CI]                                                | <i>b</i> [95% CI]    | <i>b</i> [95% CI]                                          | <i>b</i> [95% CI]    | <i>b</i> [95% CI]                                                          | <i>b</i> [95% CI]    |
| Intercept                           | 2.04 [1.53, 2.56]                                                | 2.74 [2.43, 3.05]    | -2.16 [-3.13, -1.19]                                       | -1.07 [-2.01, -0.14] | -2.74 [-3.54, -1.93]                                                       | -1.79 [-2.49, -1.1]  |
| Habitat (logged)                    | -                                                                | -1.14 [-1.52, -0.75] | -                                                          | -1.56 [-2.66, -0.45] | -                                                                          | -1.34 [-2.16, -0.52] |
| Random effects                      | VC                                                               | VC                   | VC                                                         | VC                   | VC                                                                         | VC                   |
| 1st order                           | -                                                                | -                    | -                                                          | -                    | -                                                                          | -                    |
| 2nd order                           | 0.031                                                            | 0.302                | 0.596                                                      | 0.603                | 0.495                                                                      | 0.050                |
| 3rd order                           | 0.000                                                            | 0.000                | 0.175                                                      | 0.169                | 0.046                                                                      | 0.000                |
| Block                               | 0.316                                                            | 0.018                | 0.576                                                      | 0.060                | 0.338                                                                      | 0.000                |
| Residuals (additive dispersion)     | -                                                                | -                    | -                                                          | -                    | -                                                                          | -                    |
| Fixed factors                       | -                                                                | 0.258                | -                                                          | 0.416                | -                                                                          | 0.416                |
| PCV <sub>[1st order]</sub>          |                                                                  | -                    |                                                            | -                    |                                                                            | -                    |
| PCV <sub>[2nd order]</sub>          |                                                                  | -879.26%             |                                                            | -1.21%               |                                                                            | 89.84%               |
| PCV <sub>[3rd order]</sub>          |                                                                  | NA                   |                                                            | 3.32%                |                                                                            | 100.00%              |
| PCV <sub>[Block]</sub>              |                                                                  | 94.35%               |                                                            | 89.63%               |                                                                            | 100.00%              |
| PCV <sub>[Residuals]</sub>          |                                                                  | -                    |                                                            | -                    |                                                                            | -                    |
| R <sup>2</sup> <sub>GLMM(m)</sub>   |                                                                  | 37.06%               |                                                            | 9.17%                |                                                                            | 7.56%                |
| R <sup>2</sup> <sub>GLMM(c)</sub>   |                                                                  | NA                   |                                                            | 27.49%               |                                                                            | 19.82%               |
| AIC                                 | 1664.8                                                           | 1655.9               | 478.7                                                      | 476.6                | 344.2                                                                      | 340.4                |
| BIC                                 | 1677.9                                                           | 1672.3               | 496.7                                                      | 499.0                | 362.2                                                                      | 362.8                |
| Spatial autocorrelation (residuals) |                                                                  |                      |                                                            |                      |                                                                            |                      |
| x-intercept                         |                                                                  | -0.75 [-4.7, -0.14]  |                                                            | -0.43 [-3.25, 1.57]  |                                                                            | -0.42 [-2.76, 1]     |
| y-intercept                         |                                                                  | -0.09 [-0.16, -0.01] |                                                            | -0.02 [-0.06, 0.06]  |                                                                            | -0.02 [-0.06, 0.04]  |

Supplementary Table 3 cont.

| Model name                          | Response: (d) Termite genus richness<br>Poisson mixed model (log link) |                      | (e) Earthworm abundance<br>Poisson mixed model (log link) |                     | (f) Earthworm biomass<br>Linear mixed model |                      |
|-------------------------------------|------------------------------------------------------------------------|----------------------|-----------------------------------------------------------|---------------------|---------------------------------------------|----------------------|
|                                     | Null model                                                             | Full model           | Null model                                                | Full model          | Null model                                  | Full model           |
| Fixed effects                       | b [95% CI]                                                             | b [95% CI]           | b [95% CI]                                                | b [95% CI]          | b [95% CI]                                  | b [95% CI]           |
| Intercept                           | -2.22 [-3.06, -1.38]                                                   | -1.3 [-2.01, -0.59]  | 1.35 [1.09, 1.6]                                          | 1.22 [0.79, 1.66]   | 8.49 [4.68, 12.29]                          | 12.29 [8.85, 15.73]  |
| Habitat (logged)                    | -                                                                      | -1.33 [-2.19, -0.48] | -                                                         | 0.18 [-0.35, 0.71]  | -                                           | -5.71 [-9.92, -1.49] |
| Random effects                      | VC                                                                     | VC                   | VC                                                        | VC                  | VC                                          | VC                   |
| 1st order                           | -                                                                      | -                    | -                                                         | -                   | -                                           | -                    |
| 2nd order                           | 0.451                                                                  | 0.458                | 0.375                                                     | 0.367               | 1.060                                       | 0.253                |
| 3rd order                           | 0.039                                                                  | 0.046                | 0.000                                                     | 0.000               | 0.000                                       | 0.000                |
| Block                               | 0.446                                                                  | 0.034                | 0.000                                                     | 0.000               | 8.147                                       | 0.000                |
| Residuals (additive dispersion)     | -                                                                      | -                    | -                                                         | -                   | 109.806                                     | 109.806              |
| Fixed factors                       | -                                                                      | 0.305                | -                                                         | 0.007               | -                                           | 7.302                |
| PCV <sub>[1st order]</sub>          |                                                                        | -                    |                                                           | -                   |                                             | -                    |
| PCV <sub>[2nd order]</sub>          |                                                                        | -1.48%               |                                                           | 2.19%               |                                             | 76.11%               |
| PCV <sub>[3rd order]</sub>          |                                                                        | -16.64%              |                                                           | NA                  |                                             | NA                   |
| PCV <sub>[Block]</sub>              |                                                                        | 92.43%               |                                                           | NA                  |                                             | 100.00%              |
| PCV <sub>[Residuals]</sub>          |                                                                        | -                    |                                                           | -                   |                                             | 0.00%                |
| R <sup>2</sup> <sub>GLMM(m)</sub>   |                                                                        | 9.64%                |                                                           | 1.49%               |                                             | 6.22%                |
| R <sup>2</sup> <sub>GLMM(c)</sub>   |                                                                        | NA                   |                                                           | NA                  |                                             | 6.44%                |
| AIC                                 | 543.0                                                                  | 540.5                | 780.2                                                     | 781.8               | 824.6                                       | 819.0                |
| BIC                                 | 562.9                                                                  | 560.9                | 790.9                                                     | 795.2               | 838.0                                       | 835.1                |
| Spatial autocorrelation (residuals) |                                                                        |                      |                                                           |                     |                                             |                      |
| x-intercept                         |                                                                        | -0.23 [-1.63, 1.64]  |                                                           | -0.58 [-8.86, 8.75] |                                             | -1.36 [-9.13, 1.42]  |
| y-intercept                         |                                                                        | -0.03 [-0.05, 0.05]  |                                                           | -0.13 [-0.1, 0.11]  |                                             | -0.04 [-0.27, 0.11]  |

Supplementary Table 3 cont.

| Response: (g) Invertebrate biomass  |                   |                     |
|-------------------------------------|-------------------|---------------------|
| Linear mixed model                  |                   |                     |
| Model name                          | Null model        | Full model          |
| Fixed effects                       | b [95% CI]        | b [95% CI]          |
| Intercept                           | 0.22 [0.14, 0.31] | 0.11 [0.05, 0.18]   |
| Habitat (logged)                    | -                 | 0.18 [0.1, 0.25]    |
| Random effects                      | VC                | VC                  |
| 1st order                           | -                 | -                   |
| 2nd order                           | 0.000             | 0.000               |
| 3rd order                           | 0.000             | 0.000               |
| Block                               | 0.008             | 0.000               |
| Residuals (additive dispersion)     | 0.055             | 0.055               |
| Fixed factors                       | -                 | 0.006               |
| PCV <sub>[1st order]</sub>          |                   | -                   |
| PCV <sub>[2nd order]</sub>          |                   | NA                  |
| PCV <sub>[3rd order]</sub>          |                   | NA                  |
| PCV <sub>[Block]</sub>              |                   | 100.00%             |
| PCV <sub>[Residuals]</sub>          |                   | 0.63%               |
| R <sup>2</sup> <sub>GLMM(m)</sub>   |                   | 10.14%              |
| R <sup>2</sup> <sub>GLMM(c)</sub>   |                   | 10.14%              |
| AIC                                 | 12.0              | 8.9                 |
| BIC                                 | 28.4              | 28.6                |
| Spatial autocorrelation (residuals) |                   |                     |
| x-intercept                         |                   | -3.91 [-6.23, 1.92] |
| y-intercept                         |                   | -0.02 [-0.11, 0.06] |

For full models, the intercept represents the primary forest control. CI = Confidence interval; PCV = Proportion change in variance; NA = Not applicable/available; AIC = Akaike Information Criterion; BIC = Bayesian Information Criterion; VC = Variance components

Supplementary Table 4. Mixed effects modelling testing for the effects of logging on five aspects of the physical and biotic environment: (a) leaf area index, (b) maximum air temperature, (c) minimum relative humidity, (d) fungal hyphae abundance and (e) fruiting and flowering.

| Model name                          | Response: (a) Leaf Area Index<br>Linear mixed model |                      | (b) Maximum air temperature<br>Linear mixed model |                      | (c) Minimum relative humidity<br>Linear mixed model |                      |
|-------------------------------------|-----------------------------------------------------|----------------------|---------------------------------------------------|----------------------|-----------------------------------------------------|----------------------|
|                                     | Null model                                          | Full model           | Null model                                        | Full model           | Null model                                          | Full model           |
| Fixed effects                       | <i>b</i> [95% CI]                                   | <i>b</i> [95% CI]    | <i>b</i> [95% CI]                                 | <i>b</i> [95% CI]    | <i>b</i> [95% CI]                                   | <i>b</i> [95% CI]    |
| Intercept                           | 3.95 [3.77, 4.12]                                   | 4.31 [3.97, 4.65]    | 27.69 [27.16, 28.22]                              | 26.56 [25.55, 27.58] | 85.34 [83.69, 86.99]                                | 89.31 [86.06, 92.55] |
| Habitat (logged)                    | -                                                   | -0.46 [-0.84, -0.08] | -                                                 | 1.4 [0.28, 2.51]     | -                                                   | -4.89 [-8.41, -1.36] |
| Random effects                      | VC                                                  | VC                   | VC                                                | VC                   | VC                                                  | VC                   |
| 1st order                           | -                                                   | -                    | -                                                 | -                    | -                                                   | -                    |
| 2nd order                           | -                                                   | -                    | 0.1254                                            | 0.1255               | 1.9180                                              | 2.2300               |
| 3rd order                           | 0.0713                                              | 0.0577               | 0.8491                                            | 0.8094               | 9.4830                                              | 7.6170               |
| Block                               | 0.0150                                              | 0.0000               | 0.5927                                            | 0.1371               | 1.9440                                              | 0.0000               |
| Residuals (additive dispersion)     | 0.4306                                              | 0.4300               | 2.2110                                            | 2.2145               | 53.3450                                             | 53.5600              |
| Fixed factors                       | -                                                   | 0.0348               | -                                                 | 0.0265               | -                                                   | 3.4647               |
| PCV <sub>[1st order]</sub>          |                                                     | -                    |                                                   | -                    |                                                     | -                    |
| PCV <sub>[2nd order]</sub>          |                                                     | -                    |                                                   | -0.08%               |                                                     | -16.27%              |
| PCV <sub>[3rd order]</sub>          |                                                     | 19.10%               |                                                   | 4.68%                |                                                     | 19.68%               |
| PCV <sub>[Block]</sub>              |                                                     | 100.00%              |                                                   | 76.87%               |                                                     | 100.00%              |
| PCV <sub>[Residuals]</sub>          |                                                     | 0.13%                |                                                   | -0.16%               |                                                     | -0.40%               |
| R <sup>2</sup> <sub>GLMM(m)</sub>   |                                                     | 6.66%                |                                                   | 7.67%                |                                                     | 5.18%                |
| R <sup>2</sup> <sub>GLMM(c)</sub>   |                                                     | 17.70%               |                                                   | 37.79%               |                                                     | 19.90%               |
| AIC                                 | 227.8                                               | 226.0                | 963.9                                             | 960.0                | 1641.2                                              | 1633.9               |
| BIC                                 | 238.3                                               | 239.1                | 981.4                                             | 981.0                | 1658.5                                              | 1654.6               |
| Spatial autocorrelation (residuals) |                                                     |                      |                                                   |                      |                                                     |                      |
| x-intercept                         |                                                     | -9.63 [-10.71, 4]    |                                                   | -1.43 [-5.46, 1.33]  |                                                     | -1.37 [-5.78, 3.59]  |
| y-intercept                         |                                                     | -0.04 [-0.17, 0.1]   |                                                   | -0.06 [-0.13, 0.01]  |                                                     | -0.03 [-0.11, 0.04]  |

Supplementary Table 4 cont.

| Model name                          | Response: (d) Fungal hyphae abundance<br>Poisson mixed model |                      | (e) Fruiting and flowering<br>Binomial mixed model |                     |
|-------------------------------------|--------------------------------------------------------------|----------------------|----------------------------------------------------|---------------------|
|                                     | Null model                                                   | Full model           | Null model                                         | Full model          |
| Fixed effects                       | b [95% CI]                                                   | b [95% CI]           | b [95% CI]                                         | b [95% CI]          |
| Intercept                           | 2 [1.52, 2.48]                                               | 2.8 [1.96, 3.64]     | 0.54 [-0.2, 1.29]                                  | -0.83 [-2.17, 0.5]  |
| Habitat (logged)                    | -                                                            | -1.03 [-1.98, -0.08] | -                                                  | 1.72 [0.23, 3.22]   |
| Random effects                      | VC                                                           | VC                   | VC                                                 | VC                  |
| 1st order                           | -                                                            | -                    | -                                                  | -                   |
| 2nd order                           | -                                                            | -                    | -                                                  | -                   |
| 3rd order                           | 0.3676                                                       | 0.3636               | 0.0000                                             | 0.0000              |
| Block                               | 0.3994                                                       | 0.2398               | 0.7633                                             | 0.3175              |
| Residuals (additive dispersion)     | -                                                            | -                    | -                                                  | -                   |
| Fixed factors                       | -                                                            | 0.1320               | -                                                  | 0.3848              |
| PCV <sub>[1st order]</sub>          |                                                              | -                    |                                                    | -                   |
| PCV <sub>[2nd order]</sub>          |                                                              | -                    |                                                    | -                   |
| PCV <sub>[3rd order]</sub>          |                                                              | 1.09%                |                                                    | NA                  |
| PCV <sub>[Block]</sub>              |                                                              | 39.96%               |                                                    | 58.40%              |
| PCV <sub>[Residuals]</sub>          |                                                              | -                    |                                                    | -                   |
| $R^2_{\text{GLMM}(m)}$              |                                                              | 15.30%               |                                                    | 9.64%               |
| $R^2_{\text{GLMM}(c)}$              |                                                              | NA                   |                                                    | 17.59%              |
| AIC                                 | 844.5                                                        | 842.7                | 138.4                                              | 135.9               |
| BIC                                 | 852.6                                                        | 853.5                | 146.4                                              | 146.5               |
| Spatial autocorrelation (residuals) |                                                              |                      |                                                    |                     |
| x-intercept                         |                                                              | -2.21 [-8.62, 1.02]  |                                                    | -8.46 [-9.21, 4.13] |
| y-intercept                         |                                                              | -0.12 [-0.32, 0.02]  |                                                    | -0.01 [-0.16, 0.16] |

For full models, the intercept represents the primary forest control. CI = Confidence interval; PCV = Proportion change in variance; NA = Not applicable/available; AIC = Akaike Information Criterion; BIC = Bayesian Information Criterion; VC = Variance components



Supplementary Table 5. Mixed effects modelling testing for the effects of logging on six aspects of the functional composition of invertebrate communities: (a) foraging ant abundance, (b) foraging ant species richness, (c) foraging ant body size, (d) abundance of beetle predators, (e) abundance of foraging ant specialist predators and (f) abundance of invertebrate herbivores.

| Model name                          | Response: (a) Foraging ant abundance<br>Poisson mixed model (log link) |                          | (b) Foraging ant species richness<br>Poisson mixed model (log link) |                          | (c) Foraging ant body size<br>Linear mixed model |                          |
|-------------------------------------|------------------------------------------------------------------------|--------------------------|---------------------------------------------------------------------|--------------------------|--------------------------------------------------|--------------------------|
|                                     | Null model<br>b [95% CI]                                               | Full model<br>b [95% CI] | Null model<br>b [95% CI]                                            | Full model<br>b [95% CI] | Null model<br>b [95% CI]                         | Full model<br>b [95% CI] |
| Fixed effects                       |                                                                        |                          |                                                                     |                          |                                                  |                          |
| Intercept                           | 3.99 [3.81, 4.18]                                                      | 3.96 [3.44, 4.49]        | 1.3 [1.21, 1.4]                                                     | 1.61 [1.4, 1.82]         | 0.21 [0.14, 0.27]                                | 0.37 [0.22, 0.53]        |
| Habitat (logged)                    | -                                                                      | 0.03 [-0.53, 0.6]        | -                                                                   | -0.34 [-0.56, -0.12]     | -                                                | -0.19 [-0.36, -0.02]     |
| Random effects                      | VC                                                                     | VC                       | VC                                                                  | VC                       | VC                                               | VC                       |
| 1st order                           | -                                                                      | -                        | -                                                                   | -                        | -                                                | -                        |
| 2nd order                           | 0.219                                                                  | 0.219                    | 0.000                                                               | 0.000                    | 0.010                                            | 0.010                    |
| 3rd order                           | 0.000                                                                  | 0.000                    | 0.000                                                               | 0.000                    | 0.000                                            | 0.000                    |
| Block                               | 0.047                                                                  | 0.047                    | 0.007                                                               | 0.000                    | 0.006                                            | 0.003                    |
| Residuals (additive dispersion)     | -                                                                      | -                        | -                                                                   | -                        | 0.038                                            | 0.038                    |
| Fixed factors                       | -                                                                      | 0.000                    | -                                                                   | 0.009                    | -                                                | 0.003                    |
| PCV <sub>[1st order]</sub>          |                                                                        | -                        |                                                                     | -                        |                                                  | -                        |
| PCV <sub>[2nd order]</sub>          |                                                                        | 0.00%                    |                                                                     | NA                       |                                                  | -1.45%                   |
| PCV <sub>[3rd order]</sub>          |                                                                        | NA                       |                                                                     | NA                       |                                                  | 79.67%                   |
| PCV <sub>[Block]</sub>              |                                                                        | 0.21%                    |                                                                     | 100.00%                  |                                                  | 50.41%                   |
| PCV <sub>[Residuals]</sub>          |                                                                        | -                        |                                                                     | -                        |                                                  | -0.06%                   |
| R <sup>2</sup> <sub>GLMM(m)</sub>   |                                                                        | 0.03%                    |                                                                     | 3.72%                    |                                                  | 5.32%                    |
| R <sup>2</sup> <sub>GLMM(c)</sub>   |                                                                        | NA                       |                                                                     | NA                       |                                                  | 30.30%                   |
| AIC                                 | 4230.3                                                                 | 4232.3                   | 776.2                                                               | 789.6                    | -20.9                                            | -20.0                    |
| BIC                                 | 4243.7                                                                 | 4249.0                   | 770.6                                                               | 787.3                    | -4.2                                             | 0.0                      |
| Spatial autocorrelation (residuals) |                                                                        |                          |                                                                     |                          |                                                  |                          |
| x-intercept                         |                                                                        | -0.96 [-4.85, -0.43]     |                                                                     | 3.5 [-4.44, 7.08]        |                                                  | -4.72 [-5.49, 2.04]      |
| y-intercept                         |                                                                        | -0.11 [-0.2, -0.03]      |                                                                     | 0.02 [-0.08, 0.13]       |                                                  | -0.05 [-0.13, 0.04]      |

Supplementary Table 5 cont.

| Model name                          | Response: (d) Beetle predators<br>Poisson mixed model (log link) |                      | (e) Foraging ant specialist predators<br>Poisson mixed model (log link) |                      | (f) Invertebrate herbivores<br>Poisson mixed model (log link) |                     |
|-------------------------------------|------------------------------------------------------------------|----------------------|-------------------------------------------------------------------------|----------------------|---------------------------------------------------------------|---------------------|
|                                     | Null model                                                       | Full model           | Null model                                                              | Full model           | Null model                                                    | Full model          |
| Fixed effects                       | b [95% CI]                                                       | b [95% CI]           | b [95% CI]                                                              | b [95% CI]           | b [95% CI]                                                    | b [95% CI]          |
| Intercept                           | 1.49 [1.13, 1.84]                                                | 2 [1.65, 2.35]       | -0.38 [-1.19, 0.43]                                                     | 1.67 [-0.5, 3.85]    | 2.48 [2.21, 2.76]                                             | 1.81 [1.16, 2.45]   |
| Habitat (logged)                    | -                                                                | -0.68 [-1.09, -0.28] | -                                                                       | -2.24 [-4.54, 0.05]  | -                                                             | 0.78 [0.09, 1.46]   |
| Random effects                      | VC                                                               | VC                   | VC                                                                      | VC                   | VC                                                            | VC                  |
| 1st order                           | -                                                                | -                    | -                                                                       | -                    | -                                                             | -                   |
| 2nd order                           | 0.412                                                            | 0.413                | 2.988                                                                   | 3.123                | -                                                             | -                   |
| 3rd order                           | 0.023                                                            | 0.015                | 2.657                                                                   | 2.488                | 0.242                                                         | 0.230               |
| Block                               | 0.096                                                            | 0.003                | 0.279                                                                   | 0.043                | 0.071                                                         | 0.019               |
| Residuals (additive dispersion)     | -                                                                | -                    | -                                                                       | -                    | -                                                             | -                   |
| Fixed factors                       | -                                                                | 0.094                | -                                                                       | 0.400                | -                                                             | 0.061               |
| PCV <sub>[1st order]</sub>          |                                                                  | -                    |                                                                         | -                    |                                                               | -                   |
| PCV <sub>[2nd order]</sub>          |                                                                  | -0.31%               |                                                                         | -4.51%               |                                                               | NA                  |
| PCV <sub>[3rd order]</sub>          |                                                                  | 32.90%               |                                                                         | 6.36%                |                                                               | 0.048704792         |
| PCV <sub>[Block]</sub>              |                                                                  | 97.05%               |                                                                         | 84.55%               |                                                               | 0.732465351         |
| PCV <sub>[Residuals]</sub>          |                                                                  | -                    |                                                                         | -                    |                                                               | -                   |
| R <sup>2</sup> <sub>GLMM(m)</sub>   |                                                                  | 12.87%               |                                                                         | 5.75%                |                                                               | 0.1558346           |
| R <sup>2</sup> <sub>GLMM(c)</sub>   |                                                                  | NA                   |                                                                         | NA                   |                                                               | NA                  |
| AIC                                 | 1495.8                                                           | 1492.7               | 1330.2                                                                  | 1328.8               | 2738.8                                                        | 2736.9              |
| BIC                                 | 1508.9                                                           | 1509.1               | 1343.5                                                                  | 1345.5               | 2746.9                                                        | 2747.6              |
| Spatial autocorrelation (residuals) |                                                                  |                      |                                                                         |                      |                                                               |                     |
| x-intercept                         |                                                                  | -0.77 [-4.76, -0.01] |                                                                         | -1.17 [-4.62, -0.09] |                                                               | -1.81 [-7.58, 8.45] |
| y-intercept                         |                                                                  | -0.08 [-0.16, 0]     |                                                                         | -0.08 [-0.16, 0]     |                                                               | -0.1 [-0.1, 0.09]   |

For full models, the intercept represents the primary forest control. CI = Confidence interval; PCV = Proportion change in variance; NA = Not applicable/available; AIC = Akaike Information Criterion; BIC = Bayesian Information Criterion; VC = Variance components

Supplementary Table 6. Mixed effects modelling testing for the effects of logging on five aspects of the functional composition of vertebrate communities: (a) small mammal capture rate, (b) frog occupancy, (c) insectivorous bird abundance, (d) granivorous bird occupancy and (e) insectivorous bat abundance.

| Model name                          | Response: (a) Small mammal capture rate<br>Linear mixed model |                     | (b) Frog occupancy<br>Binomial mixed model (logit link) |                          | (c) Insectivorous bird abundance<br>Poisson mixed model (log link) |                     |
|-------------------------------------|---------------------------------------------------------------|---------------------|---------------------------------------------------------|--------------------------|--------------------------------------------------------------------|---------------------|
|                                     | Null model                                                    | Full model          | Null model                                              | Full model               | Null model                                                         | Full model          |
| Fixed effects                       | <i>b</i> [95% CI]                                             | <i>b</i> [95% CI]   | <i>b</i> [95% CI]                                       | <i>b</i> [95% CI]        | <i>b</i> [95% CI]                                                  | <i>b</i> [95% CI]   |
| Intercept                           | 0.26 [0.16, 0.35]                                             | 0.14 [0.03, 0.24]   | -3.56 [-5.38, -1.73]                                    | -34.47 [-521.26, 452.32] | 2.83 [2.75, 2.91]                                                  | 2.61 [2.47, 2.75]   |
| Habitat (logged)                    | -                                                             | 0.18 [0.06, 0.29]   | -                                                       | 31.84 [-454.95, 518.63]  | -                                                                  | 0.27 [0.12, 0.42]   |
| Random effects                      | VC                                                            | VC                  | VC                                                      | VC                       | VC                                                                 | VC                  |
| 1st order                           | 0.0004                                                        | 0.0004              | -                                                       | -                        | -                                                                  | -                   |
| 2nd order                           | 0.0014                                                        | 0.0014              | 2.782                                                   | 1.107                    | -                                                                  | -                   |
| 3rd order                           | 0.0087                                                        | 0.0094              | 0.000                                                   | 0.000                    | 0.0084                                                             | 0.0056              |
| Block                               | 0.0100                                                        | 0.0008              | 0.000                                                   | 0.000                    | 0.0068                                                             | 0.0000              |
| Residuals (additive dispersion)     | 0.0398                                                        | 0.0398              | -                                                       | -                        | -                                                                  | -                   |
| Fixed factors                       | -                                                             | 0.0053              | -                                                       | 202.749                  | -                                                                  | 0.0098              |
| PCV <sub>[1st order]</sub>          |                                                               | -3.76%              |                                                         | -                        |                                                                    | -                   |
| PCV <sub>[2nd order]</sub>          |                                                               | -1.84%              |                                                         | 60.21%                   |                                                                    | -                   |
| PCV <sub>[3rd order]</sub>          |                                                               | -7.44%              |                                                         | 100.00%                  |                                                                    | 33.27%              |
| PCV <sub>[Block]</sub>              |                                                               | 92.07%              |                                                         | 100.00%                  |                                                                    | 100.00%             |
| PCV <sub>[Residuals]</sub>          |                                                               | 0.01%               |                                                         | -                        |                                                                    | -                   |
| R <sup>2</sup> <sub>GLMM(m)</sub>   |                                                               | 9.30%               |                                                         | 97.88%                   |                                                                    | 13.48%              |
| R <sup>2</sup> <sub>GLMM(c)</sub>   |                                                               | 30.22%              |                                                         | 98.41%                   |                                                                    | NA                  |
| AIC                                 | -377.0                                                        | -375.9              | 106.4                                                   | 100.8                    | 668.7                                                              | 660.7               |
| BIC                                 | -346.2                                                        | -340.0              | 119.6                                                   | 117.2                    | 679.7                                                              | 674.4               |
| Spatial autocorrelation (residuals) |                                                               |                     |                                                         |                          |                                                                    |                     |
| x-intercept                         |                                                               | -0.54 [-4.1, 0.36]  |                                                         | -0.48 [-2.97, 53.5]      |                                                                    | -0.69 [-8.43, 4.67] |
| y-intercept                         |                                                               | -0.02 [-0.04, 0.01] |                                                         | -0.03 [-0.11, 0.07]      |                                                                    | -0.01 [-0.15, 0.14] |

Supplementary Table 6 cont.

| Model name                          | Response: (d) Granivorous bird occupancy<br>Binomial mixed model (logit link) |                   | (e) Insectivorous bat abundance<br>Poisson mixed model (log link) |                     |
|-------------------------------------|-------------------------------------------------------------------------------|-------------------|-------------------------------------------------------------------|---------------------|
|                                     | Null model                                                                    | Full model        | Null model                                                        | Full model          |
| Fixed effects                       | <i>b</i> [95% CI]                                                             | <i>b</i> [95% CI] | <i>b</i> [95% CI]                                                 | <i>b</i> [95% CI]   |
| Intercept                           | 3.61 [2.46, 4.76]                                                             | 0 [0, 0]          | 0.75 [0.52, 0.98]                                                 | 0.98 [0.33, 1.64]   |
| Habitat (logged)                    | -                                                                             | 0 [0, 0]          | -                                                                 | -0.26 [-0.96, 0.44] |
| Random effects                      | VC                                                                            | VC                | VC                                                                | VC                  |
| 1st order                           | -                                                                             | -                 | -                                                                 | -                   |
| 2nd order                           | -                                                                             | -                 | -                                                                 | -                   |
| 3rd order                           | 0.0000                                                                        | 0.0000            | 0.2431                                                            | 0.2427              |
| Block                               | 0.0000                                                                        | 0.0000            | 0.0000                                                            | 0.0000              |
| Residuals (additive dispersion)     | -                                                                             | -                 | -                                                                 | -                   |
| Fixed factors                       | -                                                                             | -                 | -                                                                 | 0.0076              |
| PCV <sub>[1st order]</sub>          |                                                                               | -                 |                                                                   | -                   |
| PCV <sub>[2nd order]</sub>          |                                                                               | -                 |                                                                   | -                   |
| PCV <sub>[3rd order]</sub>          |                                                                               | 100.00%           |                                                                   | 0.16%               |
| PCV <sub>[Block]</sub>              |                                                                               | NA                |                                                                   | NA                  |
| PCV <sub>[Residuals]</sub>          |                                                                               | -                 |                                                                   | -                   |
| R <sup>2</sup> <sub>GLMM(m)</sub>   |                                                                               | 97.68%            |                                                                   | 1.19%               |
| R <sup>2</sup> <sub>GLMM(c)</sub>   |                                                                               | 97.68%            |                                                                   | NA                  |
| AIC                                 | 33.7                                                                          | 0.0               | 419.5                                                             | 421.0               |
| BIC                                 | 42.0                                                                          | 0.0               | 427.1                                                             | 431.2               |
| Spatial autocorrelation (residuals) |                                                                               |                   |                                                                   |                     |
| x-intercept                         |                                                                               | 0 [0, 0]          |                                                                   | -2.28 [-9.42, 5.5]  |
| y-intercept                         |                                                                               | 0 [0, 0]          |                                                                   | -0.11 [-0.21, 0.07] |

For full models, the intercept represents the primary forest control. CI = Confidence interval; PCV = Proportion change in variance; NA = Not applicable/available; AIC = Akaike Information Criterion; BIC = Bayesian Information Criterion; VC = Variance components

## Supplementary Reference

- 1 Ewers, R. M. *et al.* A large-scale forest fragmentation experiment: the Stability of Altered Forest Ecosystems Project. *Philos. Trans. R. Soc. B-Biol. Sci.* **366**, 3292-3302, (2011).
